# Supplementary material for: Initial reduction of CO2 on perfect and O-defective CeO2 (111) surfaces: towards CO or COOH?
Source: Royal Society of Chemistry journal article supplement (doi:10.1039/c5ra17825h), 2015-01-01
Supplement: c5ra17825h1.pdf [file c5ra17825h1.pdf]

## Electronic Supplementary Information

### **Initial reduction of CO<sub>2</sub> on perfect and O-defective CeO<sub>2</sub>(111) surfaces: towards CO or COOH?**

Xiaoqing Lu,\* Weili Wang, Shuxian Wei, Chen Guo, Yang Shao, Mingmin Zhang,  
Zhigang Deng, Houyu Zhu and Wenyue Guo\*

*College of Science, China University of Petroleum, Qingdao, Shandong 266580, P. R.  
China*

\*Corresponding authors: Xiaoqing Lu, Wenyue Guo

E-mail address: luxq@upc.edu.cn and wyguo@upc.edu.cn

Telephone: 86-532-8698-1334; Fax numbers: 86-532-8698-3363

In order to understand the spin polarized effect, we have tested the adsorption of CO<sub>2</sub> with spin unrestricted and spin polarized on perfect and O-defective CeO<sub>2</sub>(111). The adsorption energies are shown in the following Table S1. As shown in Table S1, the adsorption energies of CO<sub>2</sub> on perfect and O-defective CeO<sub>2</sub>(111) surfaces with spin unrestricted and spin polarized are almost equal. The largest difference value comes from adsorbed CO<sub>2</sub> in D-2 configuration, which is only 0.07 eV (-0.88 vs. -0.81 eV) and is far smaller than the DFT itself deviation.

**Table S1** Adsorption energies (in eV) of adsorbed CO<sub>2</sub> on perfect and O-defective CeO<sub>2</sub>(111) surfaces with spin unrestricted and spin polarized.

| Configurations | $E_{ads}$ (spin unrestricted) | $E_{ads}$ (spin polarized) |
|----------------|-------------------------------|----------------------------|
| P-1            | -0.54                         | -0.54                      |
| P-2            | -0.38                         | -0.37                      |
| P-3            | -0.12                         | -0.12                      |
| D-1            | -0.69                         | -0.63                      |
| D-2            | -0.88                         | -0.81                      |
| D-3            | -1.12                         | -1.10                      |
